# Supplementary material for: The splicing‐regulatory lncRNA NTRAS sustains vascular integrity
Source: PubMed Central journal article supplement (PMC9171682; doi:10.15252/embr.202154157), 2022-05-08
Supplement: EMBR-23-e54157-s001.pdf [file EMBR-23-e54157-s001.pdf]

## Expanded View Figures

### Figure EV1. NTRAS is essential for normal endothelial cell function.

- A Illustration of the human *NTRAS* and *GAPDH* loci. Displayed are UCSC genome browser snapshots of ribosome profiling GWIPs-viz ribose tracks.
- B Schematic representation of *NTRAS* transcript variants identified by RT-PCR and 5' RACE-PCR in HUVECs ( $n = 1$ ).
- C IGV screen shot showing *NTRAS* expression levels in HUVECs under normoxic (N) and hypoxic (H; 0.2% O<sub>2</sub> for 12 h or 24 h) conditions ( $n = 2$  independent biological replicates).
- D Digital PCR-based analysis of *NTRAS* copy numbers per  $\mu\text{g}$  of total RNA in HUVECs under normoxic (N) and hypoxic (H) conditions ( $n = 3$  independent biological replicates).
- E RT-qPCR-based analysis of VEGFA expression, controlling for hypoxia ( $n = 4$  independent biological replicates).
- F Subcellular localization of *NTRAS* in normoxic (N) and hypoxic (H) HUVECs, assayed by cellular fractionation and RT-qPCR ( $n = 3$  independent biological replicates).
- G RNAscope-based detection of *NTRAS* in HUVECs under normoxic and hypoxic conditions ( $n = 1$ ). Binding sites of the probes are indicated.
- H Validation of *NTRAS* silencing in HUVECs by RT-qPCR, comparing two different LNAs ( $n = 4$  independent biological replicates).
- I Cell cycle analysis in control and *NTRAS*-silenced HUVECs ( $n = 3$  independent biological replicates).
- J Representative images of *in vitro* sprouting comparing control and *NTRAS*-silenced HUVECs under basal conditions and VEGFA stimulation ( $n = 3$ –10 independent biological replicates). Scale bars are 50  $\mu\text{m}$ .
- K Illustration of the human and murine *NTRAS* loci (GRCh38.p13: RP11-354k1.1; GRCm38/mm10: 1700034H15).
- L Validation of *Ntras* silencing in murine H5V cells by RT-qPCR ( $n = 3$  independent biological replicates).
- M RT-qPCR-based analysis of *Ntras* expression in hearts of control and *Ntras*-silenced mice ( $n = 19$ –23 mice per group).
- N FTSC-based *in vivo* permeability assays, comparing heart homogenates from control and *Ntras*-silenced mice. Data normalized to organ and body weight ( $n = 11$ –12 mice per group). Experimental outline on the left.

Data information: In (D–F, H, I, L–N), data are represented as mean  $\pm$  SEM. n.s.: non-significant, \* $P < 0.05$ , \*\* $P < 0.01$ , \*\*\* $P < 0.001$ . (D–F, H, I, L–N) two-tailed unpaired  $t$ -test.

Source data are available online for this figure.

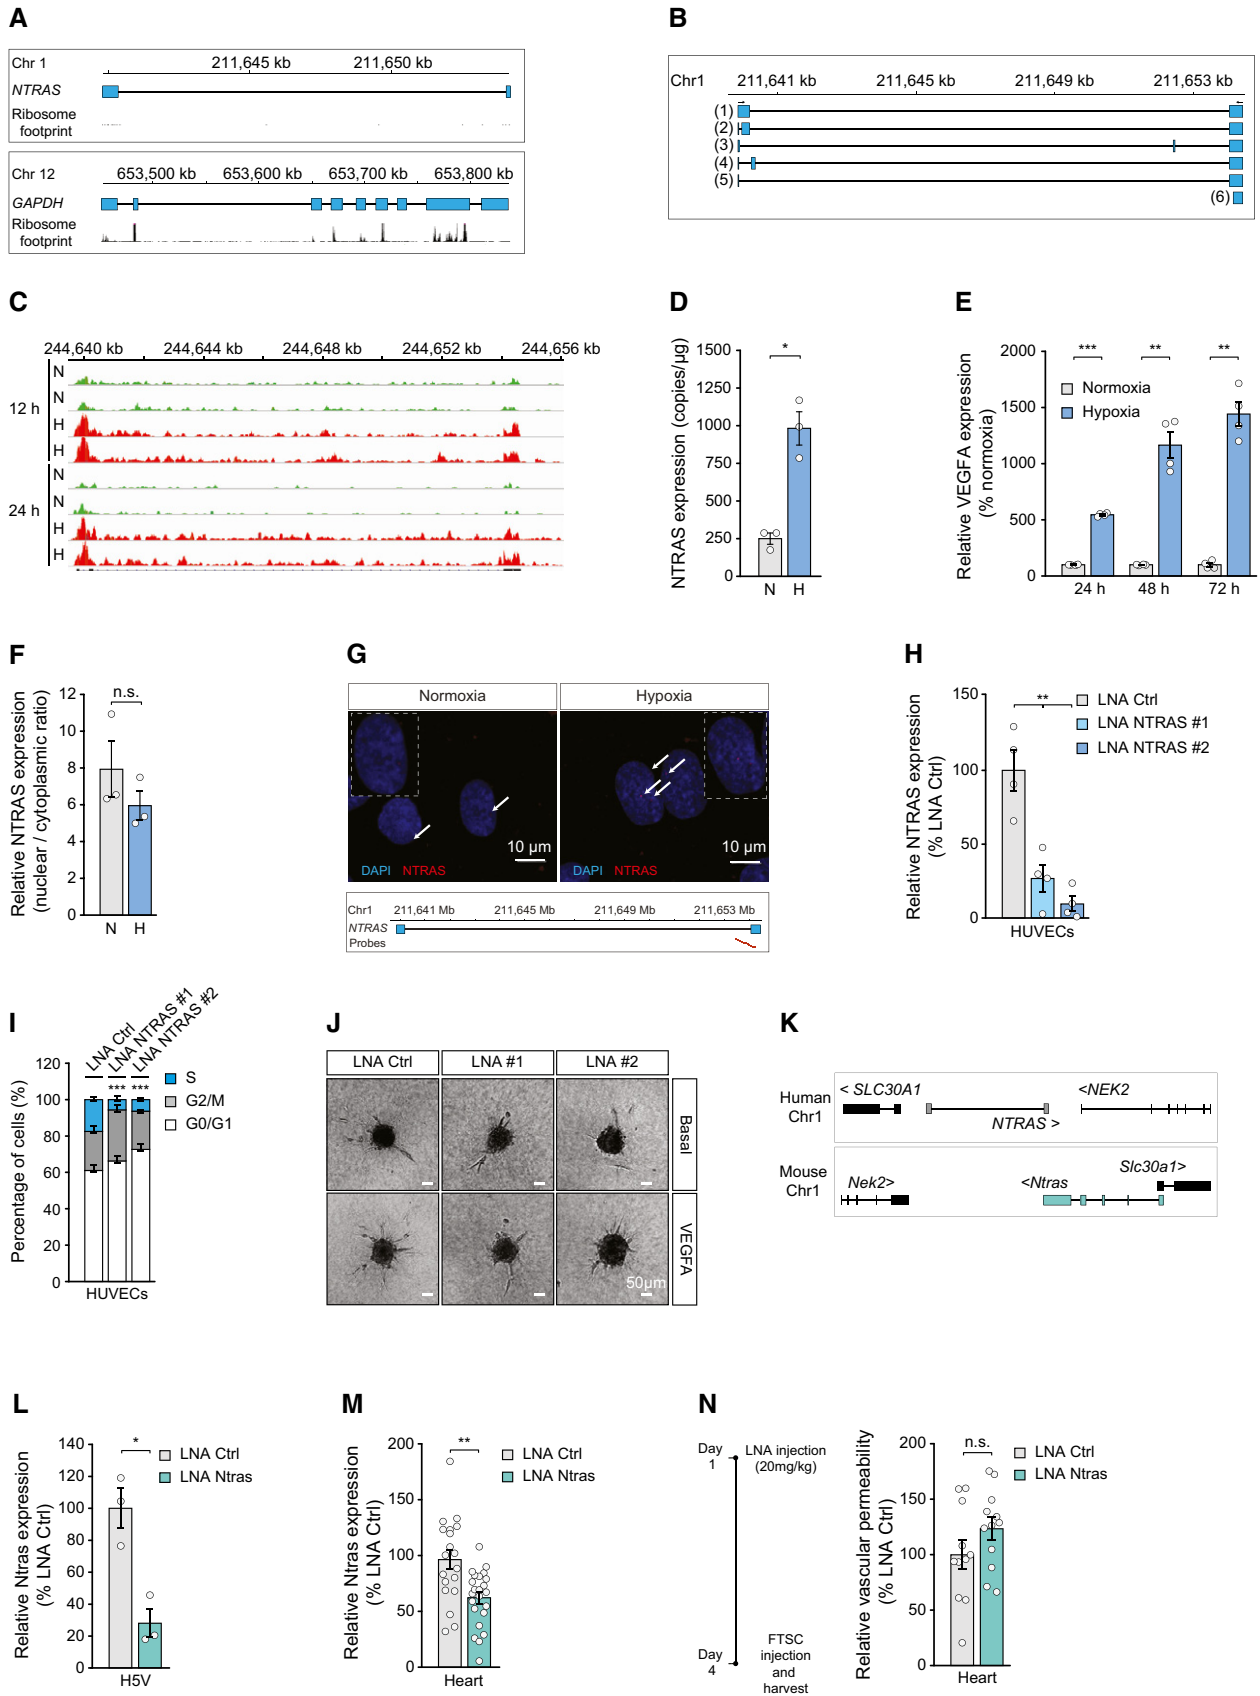

Figure EV1.

◀ **Figure EV2. NTRAS operates as splicing-regulatory lncRNA.**

- A Relative expression of NTRAS in HUVECs and HeLa cells, determined by RT-qPCR ( $n = 4$  independent biological replicates).
- B RT-qPCR-based identification of accessible regions within NTRAS using RNase H-mediated cleavage of RNA-DNA heteroduplexes (DNA antisense oligonucleotides AS1 to AS5) in HUVEC cell lysate ( $n = 1$ ). The oligonucleotide used for probe design is highlighted in red.
- C Scheme illustrating the affinity selection of endogenous NTRAS-protein complexes for RNA and protein analysis.
- D Sucrose density gradient ultracentrifugation showing the distribution of NTRAS and hnRNPL (protein). The dashed box indicates the fractions with the greatest overlap of both factors ( $n = 1$ ).
- E Illustration of the human NTRAS locus. Displayed is NTRAS (GRCh38.p13; RP11-354k1.1) and RBPmap-predicted hnRNPL binding motifs, described elsewhere (Smith et al, 2013).
- F Western blot-based validation of NTRAS-hnRNPL interaction following antisense affinity selection of NTRAS in nuclear extracts from normoxic and hypoxic HUVECs ( $n = 4$  independent biological replicates).
- G Expression of NTRAS in control and NTRAS-silenced HUVECs used for RNA sequencing ( $n = 4$  independent biological replicates).
- H hnRNPL mRNA levels in control and hnRNPL-silenced HUVECs used for RNA sequencing ( $n = 3$  independent biological replicates).
- I RT-PCR-based analysis of CD55 intron 7 retention following hnRNPL/NTRAS double knockdown in HUVECs ( $n = 4$  independent biological replicates). Representative agarose gel on the right.
- J rMATs-based analysis of alternative splicing events upon silencing of lncRNA lncflow2 in HUVECs ( $n = 4$  independent biological replicates) ES: Exon skipping, MXE: Mutually exclusive exons, A5SS: Alternative 5' splice site, A3SS: Alternative 3' splice site, RI: Retained intron.
- K Validation of hnRNPU silencing in HUVECs by RT-qPCR ( $n = 4$  independent biological replicates).
- L RT-PCR-based analysis of TJP1 exon 20 inclusion in hnRNPU-silenced HUVECs ( $n = 4$  independent biological replicates).

Data information: In (A, F-I, K, L), data are represented as mean  $\pm$  SEM. n.s.: non-significant, \*\* $P < 0.01$ , \*\*\* $P < 0.001$ . (A, F-H, K, and L) two-tailed unpaired  $t$ -test, and (I) one-way ANOVA.

Source data are available online for this figure.

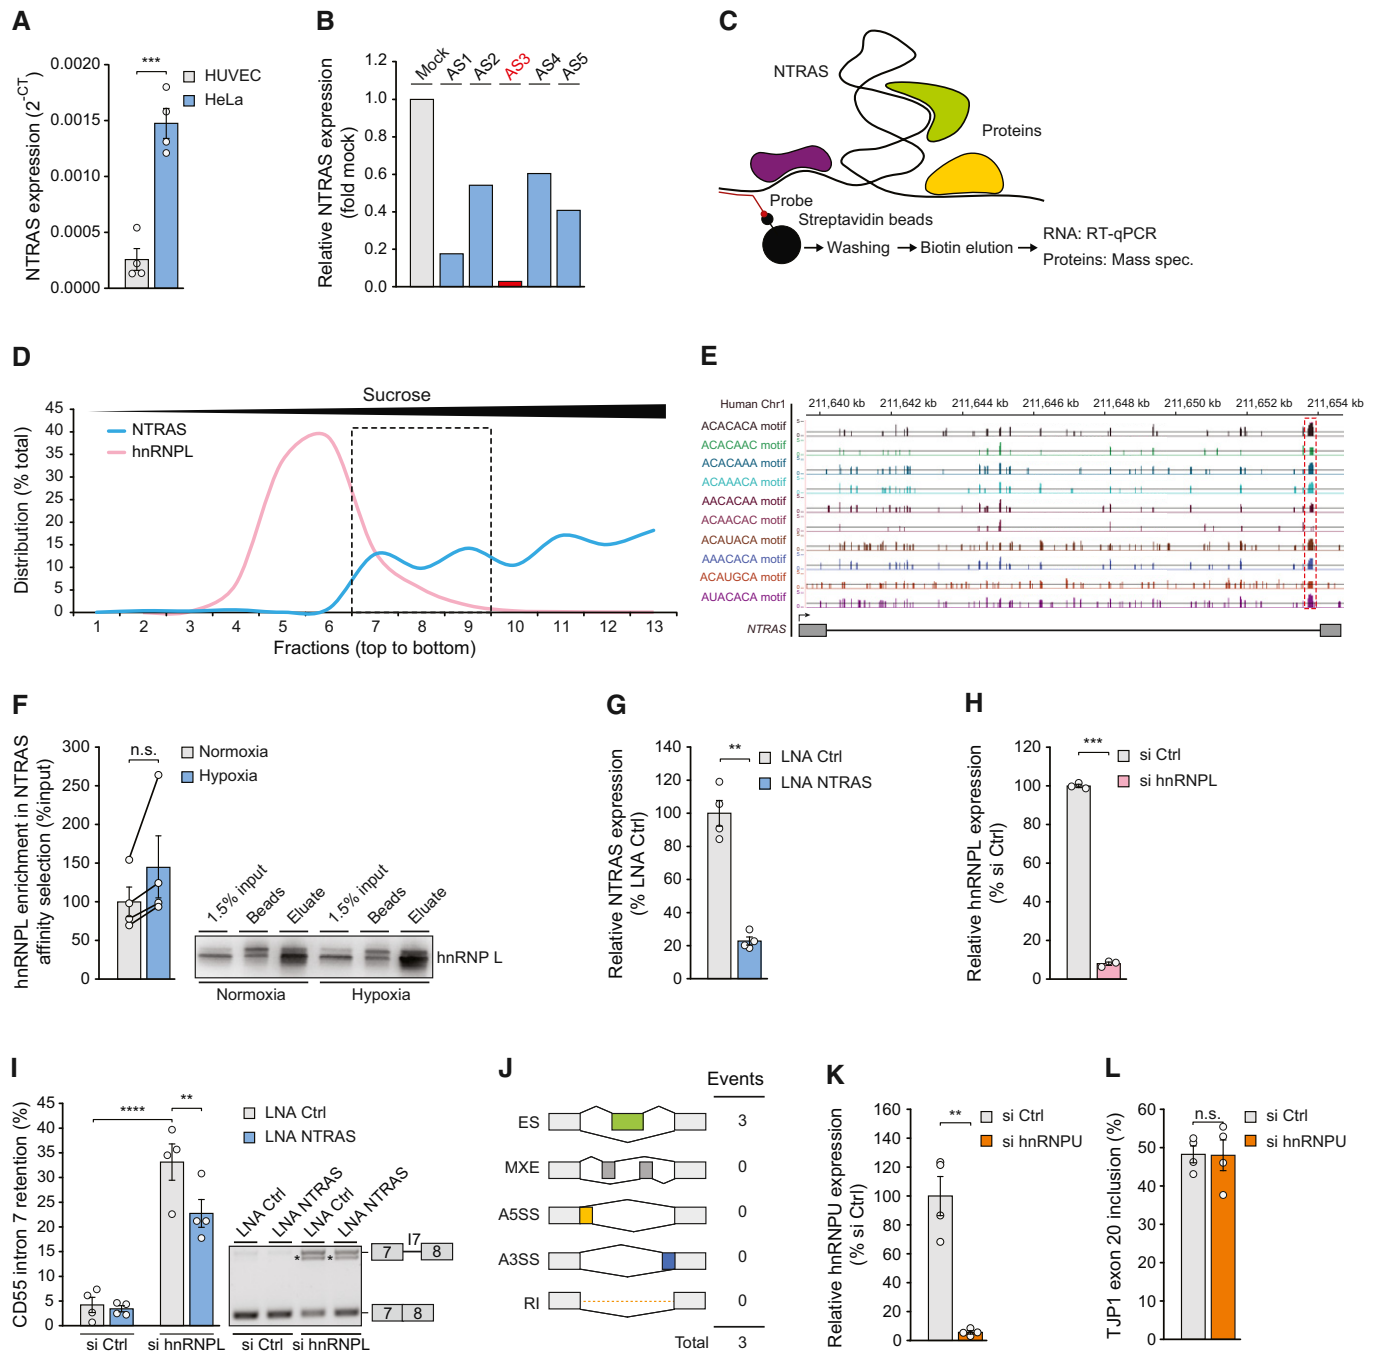

Figure EV2.

**Figure EV3. NTRAS controls TJP1 splicing and endothelial barrier function.**

- A RT-qPCR-based analysis of TJP1 mRNA expression in hnRNPL-silenced HUVECs ( $n = 7$  independent biological replicates).
- B Relative expression of BCL2, CASP3, CASP6, and CASP9 mRNA in hnRNPL-silenced HUVECs ( $n = 2$  independent biological replicates).
- C RT-qPCR-based analysis of TJP1 mRNA expression in NTRAS-silenced HUVECs ( $n = 4$  independent biological replicates).
- D RT-PCR-based analysis of Tjp1 exon 20 inclusion in control and Ntras-silenced murine CMT93 epithelial cells ( $n = 3$  independent biological replicates).
- E RT-qPCR-based validation of RNase H-mediated NTRAS degradation in HeLa nuclear extracts used for *in vitro* splicing ( $n = 4$  independent biological replicates).
- F RT-qPCR-based validation of NTRAS overexpression ( $n = 4$  independent biological replicates).
- G Co-precipitation of NTRAS in anti-hnRNPL RIPs, using nuclear lysates from control and NTRAS-overexpressing cells ( $n = 4$  independent biological replicates).
- H RT-PCR-based validation of NTRAS-CA<sub>16</sub> motif overexpression ( $n = 6$  independent biological replicates). Representative agarose gel on the right.
- I Quantification of nuclear TJP1, comparing control and NTRAS-silenced HUVECs ( $n = 4$  independent biological replicates). Representative micrographs are shown. Scale bars are 10  $\mu\text{m}$ .
- J Analysis of hnRNPL knockdown by western blot 72 h post-transfection of control or hnRNPL-targeting siRNAs ( $n = 4$  independent biological replicates). Representative western blots on the right.
- K *In vitro* permeability assays using FITC-dextran, comparing control and hnRNPL-silenced HUVECs ( $n = 6$  independent biological replicates).
- L *In vitro* permeability assays using FITC-dextran, comparing control and hnRNPL-silenced HUVECs ( $n = 4$  independent biological replicates).
- M *In vitro* permeability assays using FITC-dextran, comparing control SSO- and E20 SSO-transfected HUVECs ( $n = 5$  independent biological replicates).

Data information: In (A, C–M) data are represented as mean  $\pm$  SEM. n.s.: non-significant, \* $P < 0.05$ , \*\* $P < 0.01$ . (A–I) two-tailed unpaired t-test. Source data are available online for this figure.

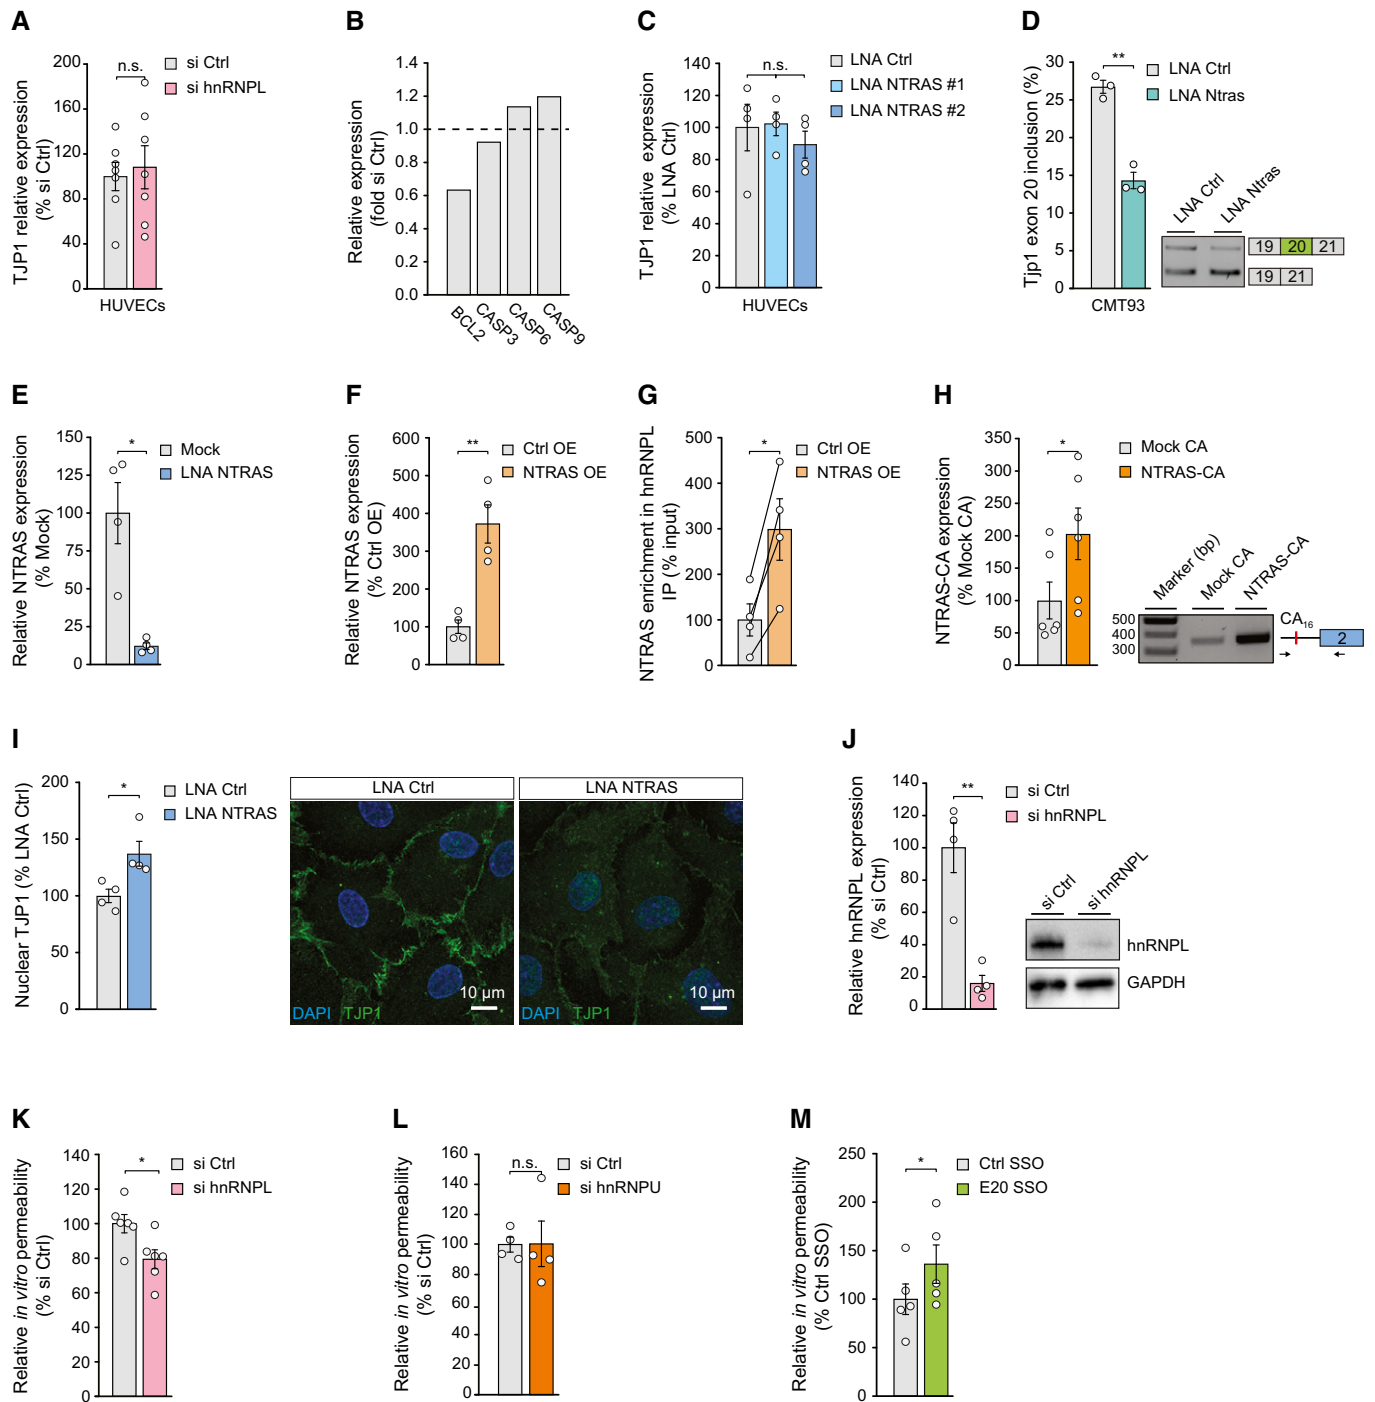

Figure EV3.

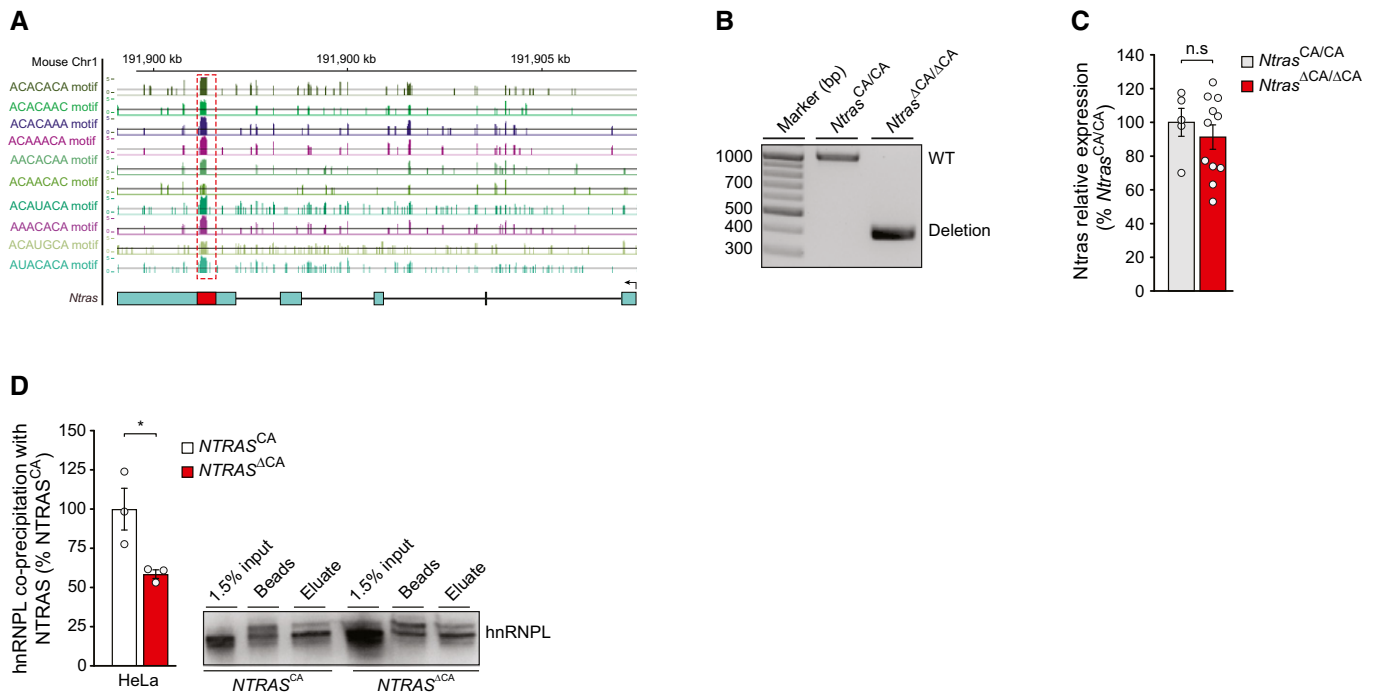

**Figure EV4. Characterization of the *Ntras* CA-repeat *in vivo*.**

A Illustration of the murine *Ntras* locus. Displayed is *Ntras* (GRCm38/mm10; 1700034H15) and RBPmap-predicted hnRNPL binding motifs, described elsewhere (Smith et al, 2013).

B Genotyping results confirming the genomic deletion of the hnRNPL binding motif in *Ntras*<sup>ΔCA/ΔCA</sup> mice.

C RT-qPCR-based analysis of *Ntras* expression in *Ntras*<sup>CA/CA</sup> and *Ntras*<sup>ΔCA/ΔCA</sup> mice ( $n = 5-11$  mice per group).

D Western blot-based analysis of the NTRAS–hnRNPL interaction following antisense affinity selection of NTRAS in nuclear fractions from *NTRAS*<sup>CA</sup> controls and *NTRAS*<sup>ΔCA</sup> HeLa cells ( $n = 3$  independent biological replicates). Representative western blot on the right.

Data information: In (C, D), data are represented as mean  $\pm$  SEM. n.s.: non-significant, \* $P < 0.05$ . (C, D) two-tailed unpaired *t*-test.

Source data are available online for this figure.
